# Supplementary material
Source: PubMed Central journal article supplement (PMC3303198)
Supplement: ja211664f_si_001.pdf [file ja211664f_si_001.pdf]

## Supporting Information for:

# UV-Induced Bursting of Cell-Sized Multi-Component Lipid Vesicles in a Photosensitive Surfactant Solution

Antoine Diguët<sup>1,2,3</sup>, Miho Yanagisawa<sup>4</sup>, Yan-Jun Liu<sup>1,2,3</sup>, Elodie Brun<sup>1,2,3</sup>, Sacha Abadie<sup>1,2,3</sup>, Sergii Rudiuk<sup>1,2,3</sup> and Damien Baigl<sup>1,2,3\*</sup>

<sup>1</sup> *Department of Chemistry, Ecole Normale Supérieure, 24 rue Lhomond, 75005 Paris, France.*

<sup>2</sup> *Université Pierre et Marie Curie Paris 6, 4 place Jussieu, 75005 Paris, France.*

<sup>3</sup> *UMR 8640, CNRS, France.*

<sup>4</sup> *Department of Physics, Faculty of Sciences, Kyushu University, Fukuoka 812-8581, Japan.*

### **\*Corresponding author**

E-mail: [damien.baigl@ens.fr](mailto:damien.baigl@ens.fr); Fax: +33 1 4432 2402; Tel: +33 1 4432 2405

Website: <http://www.baigllab.com/>

---

### **CONTENTS**

- Materials and methods
  - Figure S1
  - Legend of Movie S1
  - References
-

## 1. Materials and method

**Materials.** 1,2-dioleoyl-*sn*-glycero-3-phosphocholine (DOPC), 1,2-dipalmitoyl-*sn*-glycero-3-phosphocholine (DPPC), 1,2-dipalmitoyl-*sn*-glycero-3-phosphoethanolamine-N-(lissamine rhodamine B sulfonyl) (ammonium salt) (rhodamine-DPPE) and cholesterol were purchased from Avanti Polar Lipids. All other chemical were from Sigma. Ultrapure water (Millipore, 18 M $\Omega$ .cm) was used for all experiments.

**AzoTAB synthesis.** Azobenzene trimethylammonium bromide (AzoTAB) synthesis was adapted from the method that was described by Hayashita *et al.*<sup>1</sup> The protocol is the same as that described for AzoTAB homologs.<sup>2</sup> The purity of the final product was checked by 250 MHz <sup>1</sup>H and <sup>13</sup>C NMR spectroscopy.

**Electroformation.** For all experiments, the same electroformation<sup>3</sup> procedure was applied. First, 4  $\mu$ L of a 10 mg.mL<sup>-1</sup> solution containing the mixture of DOPC/DPPC 1:1 + cholesterol in chloroform was spread at a constant speed with a solvent safe micropipette tip (Eppendorf) on a indium tin oxide (ITO) electrode previously cleaned by isopropyl alcohol and acetone. After the phospholipid film was dried, ~400  $\mu$ L of a swelling aqueous solution containing sucrose ( $\approx$  0.1 M) and NaN<sub>3</sub> (4.6 mM) was introduced between the two electrodes separated by a 1 mm thick spacer. Electroformation was performed using a sinusoidal AC field (2 V, 10 Hz) for 3 h.

**Sedimentation.** The vesicle suspension was then extracted under low shear stress and mixed in a PDMS well with the same volume of a solution containing glucose ( $\approx$  0.1 M), NaN<sub>3</sub> (4.6 mM) and the desired AzoTAB concentration. This solution was previously adjusted to have the same osmolarity as that of the sucrose solution (112 mOsm), which was measured using a cryoscopic osmometer (Löser). The vesicles mixed with the glucose solution were then collected by gravity on a microscope glass slide after 2 h of sedimentation and observed by

optical microscopy. For the experiment involving sedimentation in a glucose solution containing *cis*-AzoTAB, the glucose/AzoTAB solution was previously exposed under UV illumination (365 nm for 15 min) using a 6 W UV lamp (Vilber Lourmat) placed 5 cm above the sample. The sedimentation was then performed in the dark.

**Microscopy.** Phase-contrast microscopy was performed with an Axioobserver D1 inverted microscope (Zeiss), equipped with a EM-CCD camera (Photonmax 512B, Princeton Scientific). For UV and visible illuminations, the light of a mercury lamp was filtered with a 365 +/- 40 nm and a 475 +/- 20 nm bandpass filter (Zeiss), respectively. A 10x objective was used for collective illumination (Figures 2-5) and a 100x objective, coupled to a 1.6x relay lens, was used for the selective destruction of individual target GUVs (Figure 7). The bursting rate ( $Y_{burst}$ ) was calculated by comparing the number of GUV before and after UV illumination on the same observation field. At least 50 vesicles were taken into account for each  $Y_{burst}$  value reported in Figure 3. Membrane domains were observed by confocal microscopy using a LSM 710 microscope (Zeiss). Liquid-ordered and liquid-disordered domains were dyed using rhodamine-DPPE (2 mol%) and perylene (0,5 mol%), respectively.<sup>4</sup>

**Centrifugation assay and UV-Vis spectroscopy.** For Figure 5 and Figure S1, centrifugation was performed using a 5424R centrifuge (Eppendorf) and UV-Vis spectra were recorded using a Synergy HT microplate reader (Biotek).

## 2. Supplementary Figure

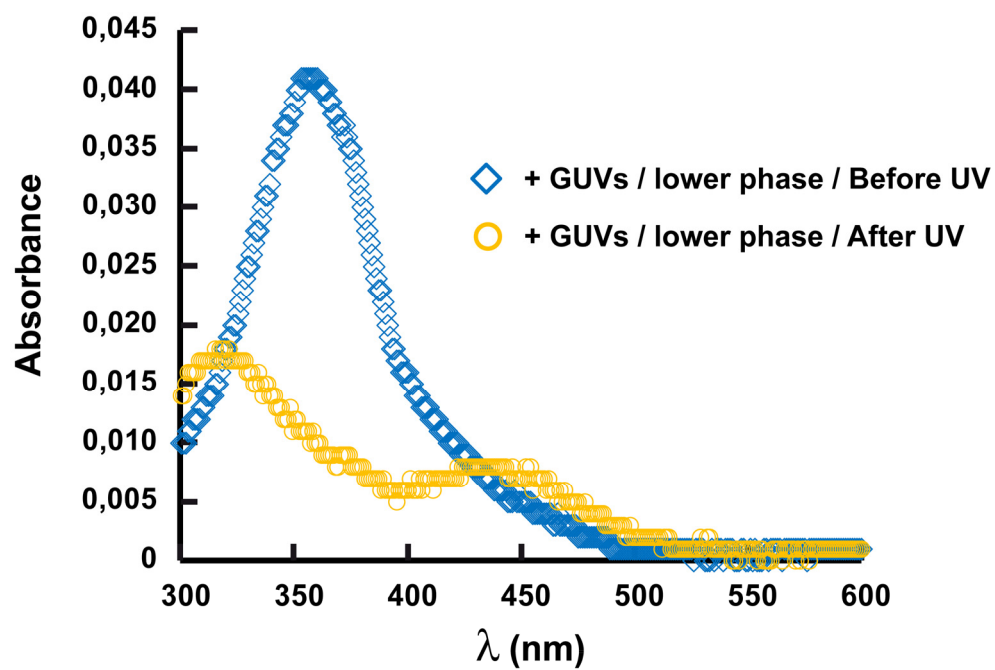

**Figure S1.** UV-induced *trans-cis* isomerization of AzoTAB in GUV membrane. Same as in Figure 5B (*trans*-AzoTAB) but before and after UV irradiation (365 nm) of the lower phase sample in the presence of GUVs.

### **3. Movie legend**

**Movie S1.** Real time observation of the effect of UV (365 nm) applied on GUVs composed of 1:1 DOPC/DPPC and 20 mol% cholesterol.

#### 4. References

- (1) Hayashita, T.; Kurosawa, T.; Miyata, T.; Tanaka, K.; Igawa, M. *Colloid Polym. Sci.* **1994**, *272*, 1611–1619
- (2) Diguët, A.; Mani, N. K.; Geoffroy, M.; Sollogoub, M.; Baigl, D. *Chem. Eur. J.* **2010**, *16*, 11890-11896
- (3) Angelova, M. I.; Dimitrov, D. S. *Faraday Discuss. Chem. Soc.* **1986**, *81*, 303–311.
- (4) Baumgart, T.; Hess, S. T.; Webb, W. W. *Nature* **2003**, *425*, 821–824
